# Supplementary material for: Rare-earth chalcogenidotetrachloride clusters (RE3ECl4, RE = Dy, Gd, Y; E = S, Se, Te): syntheses and materials properties
Source: Royal Society of Chemistry journal article supplement (doi:10.1039/d4tc02778g), 2024-01-01
Supplement: d4tc02778g1.pdf [file d4tc02778g1.pdf]

Supporting information

**Rare-Earth Chalcogenidotetrachloride Clusters ( $\text{RE}_3\text{ECl}_4$ ,  
 $\text{RE} = \text{Dy, Gd, Y}$ ;  $\text{E} = \text{S, Se, Te}$ ): Syntheses and Materials  
Properties**

Lei Li,<sup>a,b</sup> Tian-Jiao Xue,<sup>a,b</sup> You-Song Ding,<sup>a,b\*</sup> and Zhiping Zheng<sup>a,b\*</sup>

<sup>a</sup> Department of Chemistry, Southern University of Science and Technology, Shenzhen, Guangdong 518055, China. dingys@sustech.edu.cn; zhengzp@sustech.edu.cn.

<sup>b</sup> Key University Laboratory of Rare Earth Chemistry of Guangdong, Southern University of Science and Technology, Shenzhen, Guangdong 518055.

**Table S1** Crystal data and structure refinement for **Dy<sub>3</sub>SnCl<sub>4</sub>**, **Dy<sub>3</sub>SeCl<sub>4</sub>**, and **Dy<sub>3</sub>TeCl<sub>4</sub>**.

| Identification code                                    | <b>Dy<sub>3</sub>SnCl<sub>4</sub></b>                                            | <b>Dy<sub>3</sub>SeCl<sub>4</sub></b>                                             | <b>Dy<sub>3</sub>TeCl<sub>4</sub></b>                                             |
|--------------------------------------------------------|----------------------------------------------------------------------------------|-----------------------------------------------------------------------------------|-----------------------------------------------------------------------------------|
| Empirical formula                                      | C <sub>42</sub> H <sub>69</sub> Cl <sub>4</sub> Dy <sub>3</sub> O <sub>3</sub> S | C <sub>42</sub> H <sub>69</sub> Cl <sub>4</sub> Dy <sub>3</sub> O <sub>3</sub> Se | C <sub>42</sub> H <sub>69</sub> Cl <sub>4</sub> Dy <sub>3</sub> O <sub>3</sub> Te |
| Formula weight                                         | 1283.33                                                                          | 1330.23                                                                           | 1378.87                                                                           |
| Temperature/K                                          | 100                                                                              | 100                                                                               | 100                                                                               |
| Crystal system                                         | monoclinic                                                                       | monoclinic                                                                        | monoclinic                                                                        |
| Space group                                            | <i>P</i> 2 <sub>1</sub> / <i>n</i>                                               | <i>P</i> 2 <sub>1</sub> / <i>n</i>                                                | <i>P</i> 2 <sub>1</sub> / <i>n</i>                                                |
| <i>a</i> /Å                                            | 12.4410(7)                                                                       | 12.4872(9)                                                                        | 12.6415(8)                                                                        |
| <i>b</i> /Å                                            | 19.9615(12)                                                                      | 19.9721(15)                                                                       | 20.0788(14)                                                                       |
| <i>c</i> /Å                                            | 18.8018(10)                                                                      | 18.7396(13)                                                                       | 18.6221(13)                                                                       |
| <i>α</i> /°                                            | 90                                                                               | 90                                                                                | 90                                                                                |
| <i>β</i> /°                                            | 90.463(2)                                                                        | 90.542(3)                                                                         | 91.076(3)                                                                         |
| <i>γ</i> /°                                            | 90                                                                               | 90                                                                                | 90                                                                                |
| Volume/Å <sup>3</sup>                                  | 4669.1(5)                                                                        | 4673.4(6)                                                                         | 4725.9(6)                                                                         |
| 2θ range for data collection/°                         | 5.618 to 105.95                                                                  | 4.404 to 50.052                                                                   | 4.61 to 50.052                                                                    |
| Index ranges                                           | -14 ≤ <i>h</i> ≤ 14,<br>-23 ≤ <i>k</i> ≤ 23,<br>-22 ≤ <i>l</i> ≤ 22              | -14 ≤ <i>h</i> ≤ 14,<br>-23 ≤ <i>k</i> ≤ 23,<br>-22 ≤ <i>l</i> ≤ 21               | -15 ≤ <i>h</i> ≤ 14,<br>-23 ≤ <i>k</i> ≤ 23,<br>-22 ≤ <i>l</i> ≤ 22               |
| Reflections collected                                  | 40689<br>8209                                                                    | 57524<br>8198                                                                     | 37722<br>8323                                                                     |
| Independent reflections                                | [ <i>R</i> <sub>int</sub> = 0.0794,<br><i>R</i> <sub>sigma</sub> = 0.0651]       | [ <i>R</i> <sub>int</sub> = 0.0695,<br><i>R</i> <sub>sigma</sub> = 0.0459]        | [ <i>R</i> <sub>int</sub> = 0.0430,<br><i>R</i> <sub>sigma</sub> = 0.0371]        |
| Data/restraints/parameters                             | 8209/317/492                                                                     | 8198/1771/459                                                                     | 8323/859/493                                                                      |
| Goodness-of-fit on <i>F</i> <sup>2</sup>               | 1.056                                                                            | 1.274                                                                             | 1.253                                                                             |
| Final <i>R</i> indexes<br>[ <i>I</i> ≥ 2σ( <i>I</i> )] | <i>R</i> <sub>1</sub> = 0.0748,<br><i>wR</i> <sub>2</sub> = 0.1905               | <i>R</i> <sub>1</sub> = 0.0901,<br><i>wR</i> <sub>2</sub> = 0.1961                | <i>R</i> <sub>1</sub> = 0.0906,<br><i>wR</i> <sub>2</sub> = 0.1952                |
| Final <i>R</i> indexes<br>[all data]                   | <i>R</i> <sub>1</sub> = 0.0822,<br><i>wR</i> <sub>2</sub> = 0.1954               | <i>R</i> <sub>1</sub> = 0.0954,<br><i>wR</i> <sub>2</sub> = 0.1985                | <i>R</i> <sub>1</sub> = 0.0930,<br><i>wR</i> <sub>2</sub> = 0.1963                |

**Table S2** Crystal data and structure refinement for **Gd<sub>3</sub>SrCl<sub>4</sub>**, **Gd<sub>3</sub>SeCl<sub>4</sub>**, and **Gd<sub>3</sub>TeCl<sub>4</sub>**.

| Identification code                                    | <b>Gd<sub>3</sub>SrCl<sub>4</sub></b>                                            | <b>Gd<sub>3</sub>SeCl<sub>4</sub></b>                                             | <b>Gd<sub>3</sub>TeCl<sub>4</sub></b>                                             |
|--------------------------------------------------------|----------------------------------------------------------------------------------|-----------------------------------------------------------------------------------|-----------------------------------------------------------------------------------|
| Empirical formula                                      | C <sub>42</sub> H <sub>69</sub> Cl <sub>4</sub> Gd <sub>3</sub> O <sub>3</sub> S | C <sub>42</sub> H <sub>69</sub> Cl <sub>4</sub> Gd <sub>3</sub> O <sub>3</sub> Se | C <sub>42</sub> H <sub>69</sub> Cl <sub>4</sub> Gd <sub>3</sub> O <sub>3</sub> Te |
| Formula weight                                         | 1267.58                                                                          | 1314.48                                                                           | 1363.12                                                                           |
| Temperature/K                                          | 200                                                                              | 100                                                                               | 100                                                                               |
| Crystal system                                         | monoclinic                                                                       | monoclinic                                                                        | monoclinic                                                                        |
| Space group                                            | <i>P</i> 2 <sub>1</sub> / <i>n</i>                                               | <i>P</i> 2 <sub>1</sub> / <i>n</i>                                                | <i>P</i> 2 <sub>1</sub> / <i>n</i>                                                |
| <i>a</i> /Å                                            | 12.6429(6)                                                                       | 12.5326(6)                                                                        | 12.7229(6)                                                                        |
| <i>b</i> /Å                                            | 20.1652(10)                                                                      | 20.0475(12)                                                                       | 20.1326(9)                                                                        |
| <i>c</i> /Å                                            | 18.8257(10)                                                                      | 18.8177(11)                                                                       | 18.5683(9)                                                                        |
| <i>α</i> /°                                            | 90                                                                               | 90                                                                                | 90                                                                                |
| <i>β</i> /°                                            | 90.135(2)                                                                        | 91.071(2)                                                                         | 91.302(2)                                                                         |
| <i>γ</i> /°                                            | 90                                                                               | 90                                                                                | 90                                                                                |
| Volume/Å <sup>3</sup>                                  | 4799.5(4)                                                                        | 4727.1(5)                                                                         | 4755.0(4)                                                                         |
| 2θ range for data collection/°                         | 4.582 to 50.054                                                                  | 4.604 to 50.054                                                                   | 4.832 to 50.054                                                                   |
| Index ranges                                           | -14 ≤ <i>h</i> ≤ 15,<br>-23 ≤ <i>k</i> ≤ 24,<br>-22 ≤ <i>l</i> ≤ 22              | -14 ≤ <i>h</i> ≤ 14,<br>-23 ≤ <i>k</i> ≤ 23,<br>-22 ≤ <i>l</i> ≤ 22               | -13 ≤ <i>h</i> ≤ 15,<br>-23 ≤ <i>k</i> ≤ 20,<br>-22 ≤ <i>l</i> ≤ 22               |
| Reflections collected                                  | 39723<br>8443                                                                    | 63627<br>8190                                                                     | 34015<br>8387                                                                     |
| Independent reflections                                | [ <i>R</i> <sub>int</sub> = 0.0526,<br><i>R</i> <sub>sigma</sub> = 0.0401]       | [ <i>R</i> <sub>int</sub> = 0.1249,<br><i>R</i> <sub>sigma</sub> = 0.0794]        | [ <i>R</i> <sub>int</sub> = 0.0946,<br><i>R</i> <sub>sigma</sub> = 0.0776]        |
| Data/restraints/parameters                             | 8443/318/491                                                                     | 8190/1251/491                                                                     | 8387/326/490                                                                      |
| Goodness-of-fit on <i>F</i> <sup>2</sup>               | 1.222                                                                            | 1.051                                                                             | 1.122                                                                             |
| Final <i>R</i> indexes<br>[ <i>I</i> ≥ 2σ( <i>I</i> )] | <i>R</i> <sub>1</sub> = 0.0543,<br><i>wR</i> <sub>2</sub> = 0.1172               | <i>R</i> <sub>1</sub> = 0.0779,<br><i>wR</i> <sub>2</sub> = 0.1627                | <i>R</i> <sub>1</sub> = 0.0757,<br><i>wR</i> <sub>2</sub> = 0.1470                |
| Final <i>R</i> indexes<br>[all data]                   | <i>R</i> <sub>1</sub> = 0.0634,<br><i>wR</i> <sub>2</sub> = 0.1207               | <i>R</i> <sub>1</sub> = 0.1071,<br><i>wR</i> <sub>2</sub> = 0.1793                | <i>R</i> <sub>1</sub> = 0.1076,<br><i>wR</i> <sub>2</sub> = 0.1597                |

**Table S3** Crystal data and structure refinement for  $\text{Y}_3\text{SbCl}_4$ ,  $\text{Y}_3\text{SeCl}_4$ , and  $\text{Y}_3\text{TeCl}_4$ .

| Identification code                           | $\text{Y}_3\text{SbCl}_4$                                              | $\text{Y}_3\text{SeCl}_4$                                              | $\text{Y}_3\text{TeCl}_4$                                              |
|-----------------------------------------------|------------------------------------------------------------------------|------------------------------------------------------------------------|------------------------------------------------------------------------|
| Empirical formula                             | $\text{C}_{42}\text{H}_{69}\text{Cl}_4\text{O}_3\text{SY}_3$           | $\text{C}_{42}\text{H}_{69}\text{Cl}_4\text{O}_3\text{SeY}_3$          | $\text{C}_{42}\text{H}_{69}\text{Cl}_4\text{O}_3\text{TeY}_3$          |
| Formula weight                                | 1062.56                                                                | 1109.46                                                                | 1158.10                                                                |
| Temperature/K                                 | 100                                                                    | 100                                                                    | 200                                                                    |
| Crystal system                                | monoclinic                                                             | monoclinic                                                             | monoclinic                                                             |
| Space group                                   | $P2_1/n$                                                               | $P2_1/n$                                                               | $P2_1/n$                                                               |
| $a/\text{\AA}$                                | 12.4185(7)                                                             | 12.5114(9)                                                             | 12.7624(11)                                                            |
| $b/\text{\AA}$                                | 19.9574(11)                                                            | 20.0184(14)                                                            | 20.192(4)                                                              |
| $c/\text{\AA}$                                | 18.7827(11)                                                            | 18.8023(13)                                                            | 18.727(4)                                                              |
| $\alpha/^\circ$                               | 90                                                                     | 90                                                                     | 90                                                                     |
| $\beta/^\circ$                                | 90.671(3)                                                              | 90.768(2)                                                              | 91.396(5)                                                              |
| $\gamma/^\circ$                               | 90                                                                     | 90                                                                     | 90                                                                     |
| Volume/ $\text{\AA}^3$                        | 4654.8(5)                                                              | 4708.8(6)                                                              | 4824.3(14)                                                             |
| $2\theta$ range for data collection/ $^\circ$ | 5.622 to 105.954                                                       | 5.61 to 105.962                                                        | 4.584 to 55.036                                                        |
| Index ranges                                  | $-14 \leq h \leq 14,$<br>$-23 \leq k \leq 23,$<br>$-22 \leq l \leq 22$ | $-14 \leq h \leq 14,$<br>$-23 \leq k \leq 23,$<br>$-22 \leq l \leq 22$ | $-15 \leq h \leq 16,$<br>$-25 \leq k \leq 26,$<br>$-24 \leq l \leq 24$ |
| Reflections collected                         | 62841<br>8194                                                          | 47339<br>8184                                                          | 48142<br>11079                                                         |
| Independent reflections                       | $[R_{\text{int}} = 0.0866,$<br>$R_{\text{sigma}} = 0.0531]$            | $[R_{\text{int}} = 0.0694,$<br>$R_{\text{sigma}} = 0.0539]$            | $[R_{\text{int}} = 0.0938,$<br>$R_{\text{sigma}} = 0.0854]$            |
| Data/restraints/parameters                    | 8194/771/504                                                           | 8184/637/534                                                           | 11079/939/493                                                          |
| Goodness-of-fit on $F^2$                      | 1.167                                                                  | 1.095                                                                  | 1.013                                                                  |
| Final $R$ indexes<br>$[I \geq 2\sigma(I)]$    | $R_1 = 0.0929,$<br>$wR_2 = 0.2047$                                     | $R_1 = 0.0966,$<br>$wR_2 = 0.2693$                                     | $R_1 = 0.0522,$<br>$wR_2 = 0.1165$                                     |
| Final $R$ indexes<br>[all data]               | $R_1 = 0.0972,$<br>$wR_2 = 0.2066$                                     | $R_1 = 0.0984,$<br>$wR_2 = 0.2720$                                     | $R_1 = 0.1032,$<br>$wR_2 = 0.1392$                                     |

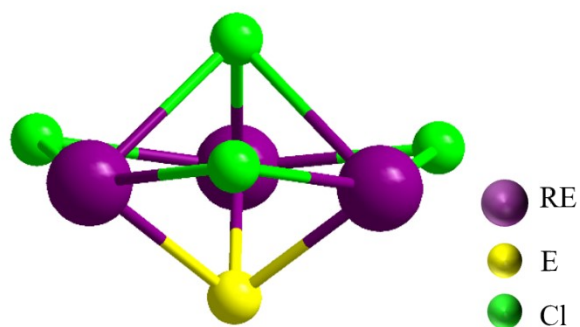

**Figure S1.** Ball-and-stick depictions of the core of  $\text{Dy}_3\text{ECl}_4$  (E = S, Se, Te).

**Table S4** Selected bond distances (Å) for **Gd<sub>3</sub>SnCl<sub>4</sub>**, **Gd<sub>3</sub>SeCl<sub>4</sub>**, and **Gd<sub>3</sub>TeCl<sub>4</sub>**

| Bond Distance (Å) | <b>Gd<sub>3</sub>SnCl<sub>4</sub></b> | <b>Gd<sub>3</sub>SeCl<sub>4</sub></b> | <b>Gd<sub>3</sub>TeCl<sub>4</sub></b> |
|-------------------|---------------------------------------|---------------------------------------|---------------------------------------|
| Gd1-S/Se/Te       | 2.718(2)                              | 2.8510(18)                            | 3.0663(13)                            |
| Gd2-S/Se/Te       | 2.717(2)                              | 2.8362(18)                            | 3.0602(13)                            |
| Gd3-S/Se/Te       | 2.731(2)                              | 2.8336(18)                            | 3.0564(12)                            |
| Average           | 2.722(8)                              | 2.8403(9)                             | 3.0609(5)                             |
| Gd1-Gd2           | 3.8442(7)                             | 3.8901(10)                            | 3.9536(11)                            |
| Gd2-Gd3           | 3.8422(7)                             | 3.8770(12)                            | 3.9571(10)                            |
| Gd3-Gd1           | 3.8568(7)                             | 3.8747(11)                            | 3.9564(10)                            |
| Average           | 3.8477(8)                             | 3.8806(8)                             | 3.9557(2)                             |

**Table S5** Selected bond distances (Å) for **Y<sub>3</sub>SnCl<sub>4</sub>**, **Y<sub>3</sub>SeCl<sub>4</sub>**, and **Y<sub>3</sub>TeCl<sub>4</sub>**

| Bond Distance (Å) | <b>Y<sub>3</sub>SnCl<sub>4</sub></b> | <b>Y<sub>3</sub>SeCl<sub>4</sub></b> | <b>Y<sub>3</sub>TeCl<sub>4</sub></b> |
|-------------------|--------------------------------------|--------------------------------------|--------------------------------------|
| Y1-S/Se/Te        | 2.6860(3)                            | 2.8140(2)                            | 3.0329(8)                            |
| Y2-S/Se/Te        | 2.6740(3)                            | 2.8331(9)                            | 3.0341(7)                            |
| Y3-S/Se/Te        | 2.6960(3)                            | 2.8259(9)                            | 3.0450(8)                            |
| Average           | 2.6850(11)                           | 2.8243(9)                            | 3.0373(7)                            |
| Y1-Y2             | 3.7870(14)                           | 3.8430(8)                            | 3.9353(8)                            |
| Y2-Y3             | 3.7890(16)                           | 3.8586(9)                            | 3.9374(8)                            |
| Y3-Y1             | 3.8090(15)                           | 3.8500(2)                            | 3.9302(10)                           |
| Average           | 3.7950(12)                           | 3.8505(8)                            | 3.9343(4)                            |

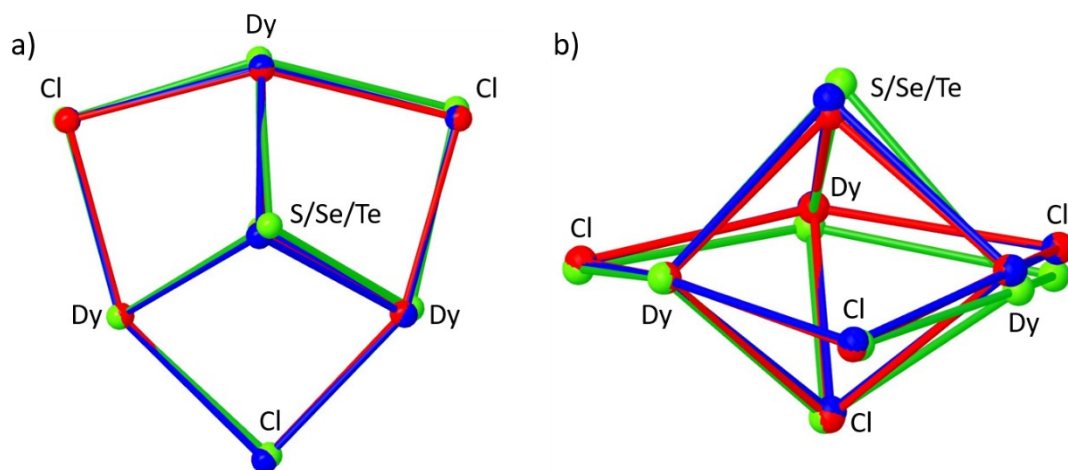

**Figure S2.** Overlay (a) top view and (b) front view of the core in  $\text{Dy}_3\text{SCl}_4$  (red),  $\text{Dy}_3\text{SeCl}_4$  (blue), and  $\text{Dy}_3\text{TeCl}_4$  (green). Other atoms are omitted for clarity.

**Table S6** Selected bond distances (Å) for **Dy<sub>3</sub>SnCl<sub>4</sub>**.

| Bond                       | Length (Å) | Bond                       | Length (Å) | Bond                       | Length (Å) |
|----------------------------|------------|----------------------------|------------|----------------------------|------------|
| Dy1-Cl1                    | 2.739(3)   | Dy2-Cl1                    | 2.755(3)   | Dy3-Cl2                    | 2.752(3)   |
| Dy1-Cl2                    | 2.745(3)   | Dy2-Cl3                    | 2.740(3)   | Dy3-Cl3                    | 2.753(3)   |
| Dy1-Cl4                    | 2.861(3)   | Dy2-Cl4                    | 2.855(3)   | Dy3-Cl4                    | 2.874(3)   |
| Dy1-C1                     | 2.655(11)  | Dy2-C11                    | 2.627(16)  | Dy3-C21                    | 2.633(15)  |
| Dy1-C2                     | 2.628(11)  | Dy2-C12                    | 2.615(13)  | Dy3-C22                    | 2.634(15)  |
| Dy1-C3                     | 2.644(12)  | Dy2-C13                    | 2.664(15)  | Dy3-C23                    | 2.658(17)  |
| Dy1-C4                     | 2.665(13)  | Dy2-C14                    | 2.643(13)  | Dy3-C24                    | 2.663(16)  |
| Dy1-C5                     | 2.712(14)  | Dy2-C15                    | 2.619(15)  | Dy3-C25                    | 2.641(16)  |
| Dy1-C <sub>pcentroid</sub> | 2.377      | Dy2-C <sub>pcentroid</sub> | 2.359      | Dy3-C <sub>pcentroid</sub> | 2.374      |



**Table S7** Selected bond distances (Å) for **Dy<sub>3</sub>SeCl<sub>4</sub>**.

| Bond                       | Length (Å) | Bond                       | Length (Å) | Bond                       | Length (Å) |
|----------------------------|------------|----------------------------|------------|----------------------------|------------|
| Dy1-Cl1                    | 2.742(5)   | Dy2-Cl1                    | 2.763(5)   | Dy3-Cl2                    | 2.746(5)   |
| Dy1-Cl3                    | 2.749(5)   | Dy2-Cl2                    | 2.751(4)   | Dy3-Cl3                    | 2.748(5)   |
| Dy1-Cl4                    | 2.845(4)   | Dy2-Cl4                    | 2.867(4)   | Dy3-Cl4                    | 2.852(4)   |
| Dy1-C1                     | 2.693(16)  | Dy2-C11                    | 2.670(2)   | Dy3-C21                    | 2.630(2)   |
| Dy1-C2                     | 2.702(15)  | Dy2-C12                    | 2.665(17)  | Dy3-C22                    | 2.630(2)   |
| Dy1-C3                     | 2.673(16)  | Dy2-C13                    | 2.673(16)  | Dy3-C23                    | 2.630(3)   |
| Dy1-C4                     | 2.610(2)   | Dy2-C14                    | 2.686(15)  | Dy3-C24                    | 2.650(3)   |
| Dy1-C5                     | 2.670(2)   | Dy2-C15                    | 2.656(19)  | Dy3-C25                    | 2.680(2)   |
| Dy1-Cp <sub>centroid</sub> | 2.378      | Dy2-Cp <sub>centroid</sub> | 2.384      | Dy3-Cp <sub>centroid</sub> | 2.354      |

**Table S8** Selected bond distances (Å) for **Dy<sub>3</sub>TeCl<sub>4</sub>**.

| Bond                       | Length (Å) | Bond                       | Length (Å) | Bond                       | Length (Å) |
|----------------------------|------------|----------------------------|------------|----------------------------|------------|
| Dy1-Cl1                    | 2.774(5)   | Dy2-Cl1                    | 2.746(5)   | Dy3-Cl2                    | 2.764(5)   |
| Dy1-Cl3                    | 2.775(5)   | Dy2-Cl2                    | 2.766(4)   | Dy3-Cl3                    | 2.769(5)   |
| Dy1-Cl4                    | 2.863(5)   | Dy2-Cl4                    | 2.828(4)   | Dy3-Cl4                    | 2.821(4)   |
| Dy1-C1                     | 2.672(16)  | Dy2-C11                    | 2.640(2)   | Dy3-C21                    | 2.612(16)  |
| Dy1-C2                     | 2.648(14)  | Dy2-C12                    | 2.620(2)   | Dy3-C22                    | 2.597(15)  |
| Dy1-C3                     | 2.629(16)  | Dy2-C13                    | 2.630(2)   | Dy3-C23                    | 2.685(17)  |
| Dy1-C4                     | 2.620(2)   | Dy2-C14                    | 2.630(3)   | Dy3-C24                    | 2.720(2)   |
| Dy1-C5                     | 2.650(2)   | Dy2-C15                    | 2.620(2)   | Dy3-C25                    | 2.670(19)  |
| Dy1-C <sub>pcentroid</sub> | 2.354      | Dy2-C <sub>pcentroid</sub> | 2.356      | Dy3-C <sub>pcentroid</sub> | 2.369      |

**Table S9** Selected bond distances (Å) for **Gd<sub>3</sub>SnCl<sub>4</sub>**.

| Bond                       | Length (Å) | Bond                       | Length (Å) | Bond                       | Length (Å) |
|----------------------------|------------|----------------------------|------------|----------------------------|------------|
| Gd1-Cl1                    | 2.780(3)   | Gd2-Cl1                    | 2.770(3)   | Gd3-Cl2                    | 2.777(2)   |
| Gd1-Cl3                    | 2.773(3)   | Gd2-Cl2                    | 2.773(2)   | Gd3-Cl3                    | 2.767(3)   |
| Gd1-Cl4                    | 2.918(2)   | Gd2-Cl4                    | 2.888(2)   | Gd3-Cl4                    | 2.893(2)   |
| Gd1-C1                     | 2.667(12)  | Gd2-C11                    | 2.692(14)  | Gd3-C21                    | 2.650(12)  |
| Gd1-C2                     | 2.655(12)  | Gd2-C12                    | 2.682(15)  | Gd3-C22                    | 2.648(11)  |
| Gd1-C3                     | 2.654(14)  | Gd2-C13                    | 2.663(12)  | Gd3-C23                    | 2.654(11)  |
| Gd1-C4                     | 2.684(13)  | Gd2-C14                    | 2.648(10)  | Gd3-C24                    | 2.675(11)  |
| Gd1-C5                     | 2.675(11)  | Gd2-C15                    | 2.677(12)  | Gd3-C25                    | 2.671(11)  |
| Gd1-Cp <sub>centroid</sub> | 2.397      | Gd2-Cp <sub>centroid</sub> | 2.396      | Gd3-Cp <sub>centroid</sub> | 2.386      |

**Table S10** Selected bond distances (Å) for **Gd<sub>3</sub>SeCl<sub>4</sub>**.

| Bond                       | Length (Å) | Bond                       | Length (Å) | Bond                       | Length (Å) |
|----------------------------|------------|----------------------------|------------|----------------------------|------------|
| Gd1-Cl1                    | 2.770(4)   | Gd2-Cl1                    | 2.783(4)   | Gd3-Cl2                    | 2.771(5)   |
| Gd1-Cl3                    | 2.779(4)   | Gd2-Cl2                    | 2.790(4)   | Gd3-Cl3                    | 2.769(4)   |
| Gd1-Cl4                    | 2.882(4)   | Gd2-Cl4                    | 2.899(4)   | Gd3-Cl4                    | 2.885(4)   |
| Gd1-C1                     | 2.669(13)  | Gd2-C11                    | 2.700(14)  | Gd3-C21                    | 2.677(13)  |
| Gd1-C2                     | 2.678(15)  | Gd2-C12                    | 2.680(16)  | Gd3-C22                    | 2.627(13)  |
| Gd1-C3                     | 2.681(14)  | Gd2-C13                    | 2.680(19)  | Gd3-C23                    | 2.660(16)  |
| Gd1-C4                     | 2.693(12)  | Gd2-C14                    | 2.673(16)  | Gd3-C24                    | 2.75(2)    |
| Gd1-C5                     | 2.667(12)  | Gd2-C15                    | 2.713(13)  | Gd3-C25                    | 2.768(15)  |
| Gd1-C <sub>pcentroid</sub> | 2.393      | Gd2-C <sub>pcentroid</sub> | 2.410      | Gd3-C <sub>pcentroid</sub> | 2.414      |

**Table S11** Selected bond distances (Å) for **Gd<sub>3</sub>TeCl<sub>4</sub>**.

| Bond                       | Length (Å) | Bond                       | Length (Å) | Bond                       | Length (Å) |
|----------------------------|------------|----------------------------|------------|----------------------------|------------|
| Gd1-Cl1                    | 2.770(4)   | Gd2-Cl1                    | 2.786(4)   | Gd3-Cl2                    | 2.783(4)   |
| Gd1-Cl3                    | 2.792(4)   | Gd2-Cl2                    | 2.804(4)   | Gd3-Cl3                    | 2.794(4)   |
| Gd1-Cl4                    | 2.864(4)   | Gd 2-Cl4                   | 2.889(4)   | Gd3-Cl4                    | 2.853(3)   |
| Gd1-C1                     | 2.66(2)    | Gd2-C11                    | 2.65(2)    | Gd3-C21                    | 2.663(18)  |
| Gd1-C2                     | 2.65(2)    | Gd2-C12                    | 2.65(2)    | Gd3-C22                    | 2.69(2)    |
| Gd1-C3                     | 2.655(19)  | Gd2-C13                    | 2.66(3)    | Gd3-C23                    | 2.657(18)  |
| Gd1-C4                     | 2.638(19)  | Gd2-C14                    | 2.659(16)  | Gd3-C24                    | 2.627(17)  |
| Gd1-C5                     | 2.666(19)  | Gd2-C15                    | 2.675(17)  | Gd3-C25                    | 2.642(19)  |
| Gd1-Cp <sub>centroid</sub> | 2.382      | Gd2-Cp <sub>centroid</sub> | 2.383      | Gd3-Cp <sub>centroid</sub> | 2.386      |

**Table S12** Selected bond distances (Å) for  $Y_3SCl_4$ .

| Bond                      | Length (Å) | Bond                      | Length (Å) | Bond                      | Length (Å) |
|---------------------------|------------|---------------------------|------------|---------------------------|------------|
| Y1-Cl1                    | 2.742(3)   | Y2-Cl1                    | 2.729(3)   | Y3-Cl2                    | 2.737(4)   |
| Y1-Cl3                    | 2.741(2)   | Y2-Cl2                    | 2.733(3)   | Y3-Cl3                    | 2.736(3)   |
| Y1-Cl4                    | 2.873(3)   | Y2-Cl4                    | 2.865(3)   | Y3-Cl4                    | 2.863(3)   |
| Y1-C1                     | 2.61(3)    | Y2-C11                    | 2.654(16)  | Y3-C21                    | 2.650(16)  |
| Y1-C2                     | 2.62(2)    | Y2-C12                    | 2.714(13)  | Y3-C22                    | 2.616(15)  |
| Y1-C3                     | 2.66(2)    | Y2-C13                    | 2.728(14)  | Y3-C23                    | 2.625(15)  |
| Y1-C4                     | 2.62(2)    | Y2-C14                    | 2.660(18)  | Y3-C24                    | 2.615(15)  |
| Y1-C5                     | 2.65(2)    | Y2-C15                    | 2.592(19)  | Y3-C25                    | 2.610(15)  |
| Y1-C <sub>pcentroid</sub> | 2.345      | Y2-C <sub>pcentroid</sub> | 2.381      | Y3-C <sub>pcentroid</sub> | 2.332      |

**Table S13** Selected bond distances (Å) for **Y<sub>3</sub>SeCl<sub>4</sub>**.

| Bond                      | Length (Å) | Bond                      | Length (Å) | Bond                      | Length (Å) |
|---------------------------|------------|---------------------------|------------|---------------------------|------------|
| Y1-Cl1                    | 2.7400(3)  | Y2-Cl1                    | 2.7410(16) | Y3-Cl2                    | 2.7397(19) |
| Y1-Cl3                    | 2.7362(18) | Y2-Cl2                    | 2.7301(18) | Y3-Cl3                    | 2.7509(18) |
| Y1-Cl4                    | 2.838(4)   | Y2-Cl4                    | 2.8460(16) | Y3-Cl4                    | 2.8559(18) |
| Y1-C1                     | 2.699(11)  | Y2-C11                    | 2.626(8)   | Y3-C21                    | 2.641(9)   |
| Y1-C2                     | 2.654(14)  | Y2-C12                    | 2.631(8)   | Y3-C22                    | 2.641(9)   |
| Y1-C3                     | 2.653(17)  | Y2-C13                    | 2.644(8)   | Y3-C23                    | 2.623(9)   |
| Y1-C4                     | 2.652(19)  | Y2-C14                    | 2.651(8)   | Y3-C24                    | 2.658(11)  |
| Y1-C5                     | 2.720(12)  | Y2-C15                    | 2.628(8)   | Y3-C25                    | 2.648(9)   |
| Y1-C <sub>pcentroid</sub> | 2.393      | Y2-C <sub>pcentroid</sub> | 2.363      | Y3-C <sub>pcentroid</sub> | 2.361      |

**Table S14** Selected bond distances (Å) for **Y<sub>3</sub>TeCl<sub>4</sub>**.

| Bond                      | Length (Å) | Bond                      | Length (Å) | Bond                      | Length (Å) |
|---------------------------|------------|---------------------------|------------|---------------------------|------------|
| Y1-Cl1                    | 2.7651(16) | Y2-Cl1                    | 2.7532(17) | Y3-Cl2                    | 2.7582(15) |
| Y1-Cl3                    | 2.7525(17) | Y2-Cl2                    | 2.7591(17) | Y3-Cl3                    | 2.7417(16) |
| Y1-Cl4                    | 2.8565(15) | Y2-Cl4                    | 2.8271(16) | Y3-Cl4                    | 2.8462(15) |
| Y1-C1                     | 2.651(6)   | Y2-C11                    | 2.647(7)   | Y3-C21                    | 2.638(6)   |
| Y1-C2                     | 2.634(6)   | Y2-C12                    | 2.663(7)   | Y3-C22                    | 2.625(6)   |
| Y1-C3                     | 2.654(6)   | Y2-C13                    | 2.649(6)   | Y3-C23                    | 2.637(6)   |
| Y1-C4                     | 2.658(6)   | Y2-C14                    | 2.624(6)   | Y3-C24                    | 2.661(6)   |
| Y1-C5                     | 2.656(6)   | Y2-C15                    | 2.622(6)   | Y3-C25                    | 2.641(6)   |
| Y1-C <sub>pcentroid</sub> | 2.365      | Y2-C <sub>pcentroid</sub> | 2.361      | Y3-C <sub>pcentroid</sub> | 2.359      |



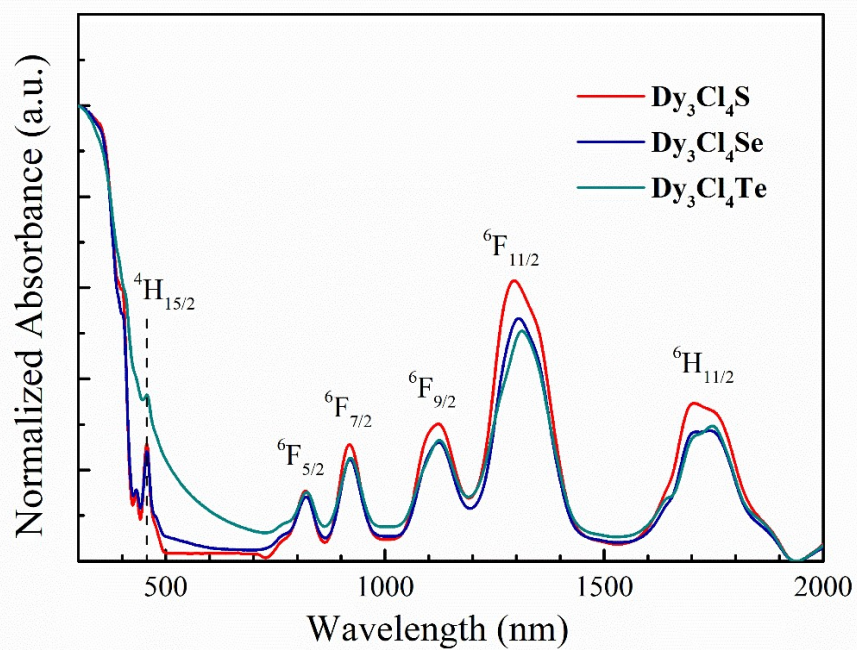

**Figure S3.** Absorption spectrum of **Dy<sub>3</sub>SCl<sub>4</sub>**, **Dy<sub>3</sub>SeCl<sub>4</sub>**, and **Dy<sub>3</sub>TeCl<sub>4</sub>** with standard assignments for the various spectral transitions.

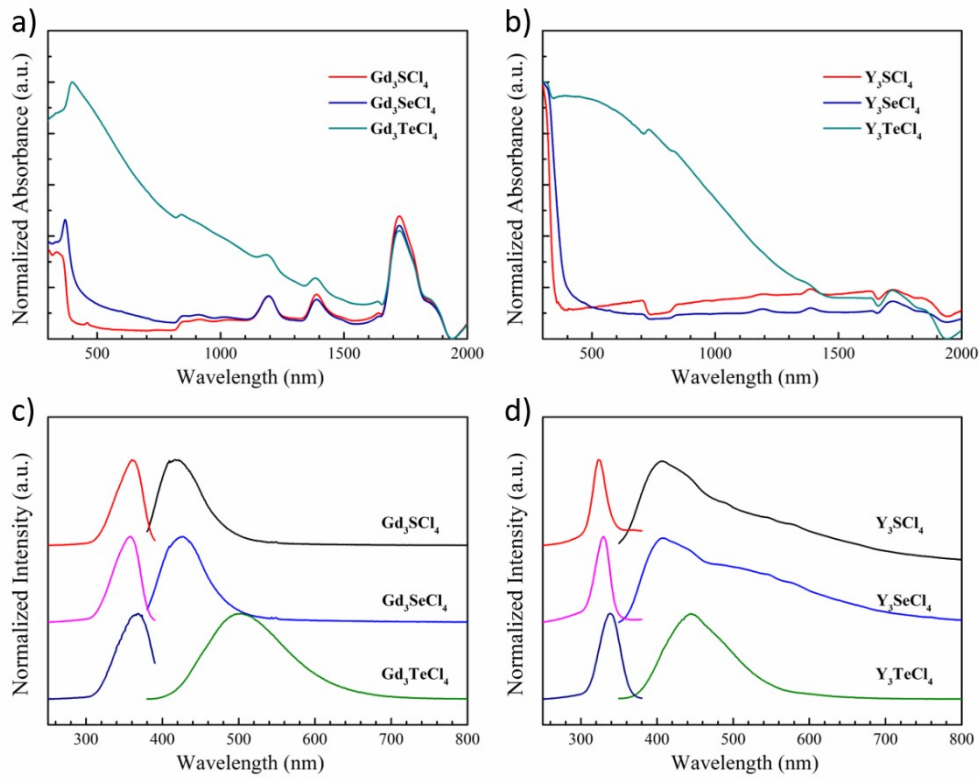

**Figure S4.** Absorption spectra of (a)  $\text{Gd}_3\text{ECl}_4$  and (b)  $\text{Y}_3\text{ECl}_4$  (E=S, Se, and Te). Room-temperature (c) excitation ( $\lambda_{\text{ex}} = 360$  nm) and emission ( $\lambda_{\text{em}} = 418$  nm and 504 nm) spectra of  $\text{Gd}_3\text{ECl}_4$  (E = S, Se, and Te); (d) excitation ( $\lambda_{\text{ex}} = 324$  nm) and emission ( $\lambda_{\text{em}} = 407$  nm and 445 nm) spectra of  $\text{Y}_3\text{ECl}_4$  (E = S, Se, and Te).

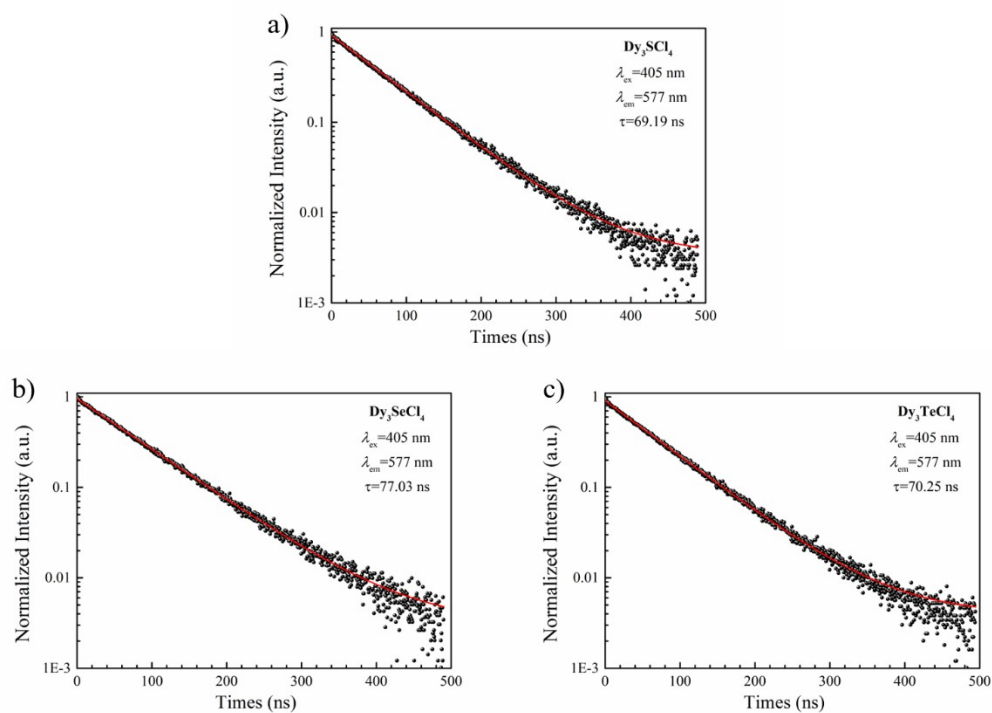

**Figure S5.** Photoluminescence decay curves of (a)  $\text{Dy}_3\text{SCl}_4$ , (b)  $\text{Dy}_3\text{SeCl}_4$ , and (c)  $\text{Dy}_3\text{TeCl}_4$  complex under 405 nm laser excitation. The solid lines are the fit curve.

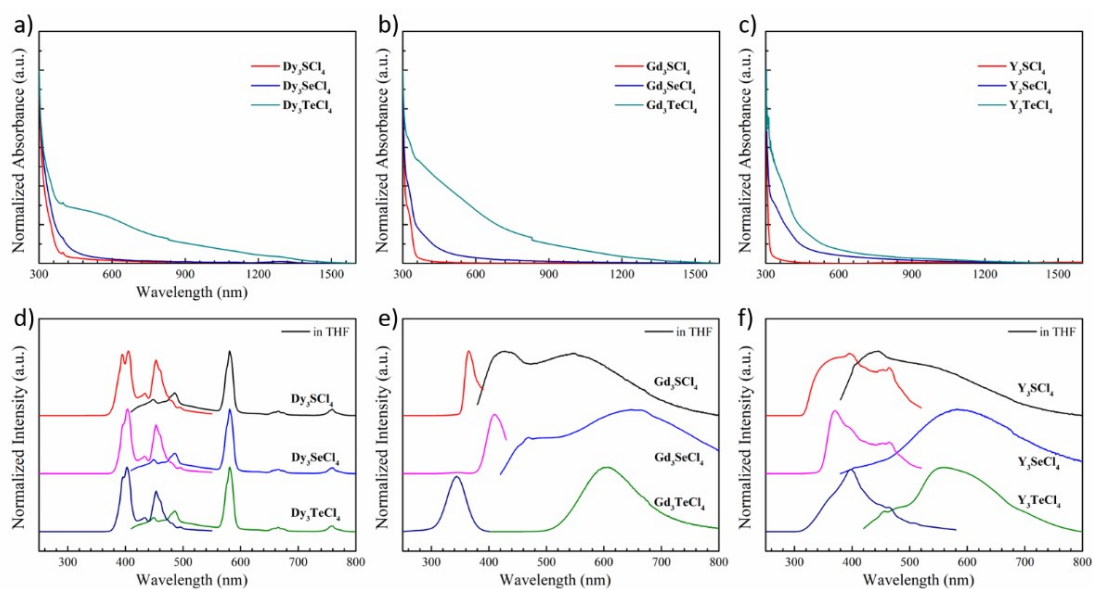

**Figure S6.** Absorption spectra (a-c) and room-temperature excitation and emission spectra (d-f) of  $\text{RE}_3\text{ECl}_4$  (RE=Dy, Gd, Y; E=S, Se, and Te) in THF.

**Table S15.** Electronic structure of **Dy1** in **Dy<sub>3</sub>ScI<sub>4</sub>** calculated with the crystal field parameters obtained from CASSCF-SO at the crystal structure. Each row corresponds to a Kramers doublet.

| Energy (cm <sup>-1</sup> ) | g1                    | g2   | g3    | Wavefunction                                                 |
|----------------------------|-----------------------|------|-------|--------------------------------------------------------------|
| 0.00                       | 6.15×10 <sup>-2</sup> | 0.14 | 19.58 | 96.3%  ± 15/2)                                               |
| 84.521                     | 0.76                  | 0.95 | 18.20 | 19.0%  ± 5/2)+17.7%  ± 9/2)+15.6%  ± 7/2)+14.3%  ± 3/2)...   |
| 159.147                    | 4.21                  | 6.11 | 10.75 | 43.8%  ± 13/2)+15.3%  ± 7/2)+11.4%  ± 11/2)+10.8%  ± 9/2)... |
| 212.036                    | 0.16                  | 3.21 | 8.71  | 35.7%  ± 13/2)+27.4%  ± 11/2)+13.8%  ± 7/2)+9.3%  ± 1/2)...  |
| 272.498                    | 1.13                  | 1.99 | 12.13 | 38.7%  ± 11/2)+30.6%  ± 9/2)+9.8%  ± 3/2)+7.1%  ± 7/2)...    |
| 315.170                    | 0.38                  | 0.58 | 16.13 | 34.4%  ± 7/2)+25.9%  ± 9/2)+22.9%  ± 5/2)+11.2%  ± 11/2)...  |
| 390.862                    | 5.54×10 <sup>-2</sup> | 0.13 | 18.18 | 31.7%  ± 5/2)+31.7%  ± 3/2)+16.8%  ± 7/2) +14.5%  ± 1/2)...  |
| 421.524                    | 5.25×10 <sup>-2</sup> | 0.16 | 19.09 | 53.9%  ± 1/2)+28.3%  ± 3/2)+8.9%  ± 5/2)+3%  ± 9/2)...       |

**Table S16.** Electronic structure of **Dy2** in **Dy<sub>3</sub>ScI<sub>4</sub>** calculated with the crystal field parameters obtained from CASSCF-SO at the crystal structure. Each row corresponds to a Kramers doublet.

| Energy (cm <sup>-1</sup> ) | g1                    | g2   | g3    | Wavefunction                                                  |
|----------------------------|-----------------------|------|-------|---------------------------------------------------------------|
| 0.00                       | 0.15                  | 0.47 | 18.72 | 85.1%  ± 15/2)+8.1%  ± 11/2)+2.9%  ± 7/2)                     |
| 49.914                     | 0.33                  | 0.65 | 19.95 | 23.0%  ± 13/2)+21.8%  ± 9/2)+13.4%  ± 5/2)+13.1%  ± 7/2)...   |
| 147.550                    | 3.88                  | 6.08 | 11.47 | 31.6%  ± 13/2)+16.5%  ± 3/2)+15.1%  ± 7/2) +11.2%  ± 1/2)...  |
| 202.003                    | 1.31                  | 2.93 | 8.60  | 30.6%  ± 13/2)+28.6%  ± 11/2)+15.9%  ± 5/2)+10.0%  ± 1/2)...  |
| 264.957                    | 0.21                  | 1.50 | 12.09 | 34.4%  ± 11/2)+28.1%  ± 9/2)+10.9%  ± 13/2) +10.5%  ± 3/2)... |
| 311.195                    | 0.57                  | 0.86 | 16.01 | 32.3%  ± 7/2)+28.8%  ± 9/2)+21.7%  ± 5/2)+9.8%  ± 11/2)...    |
| 381.584                    | 9.94×10 <sup>-3</sup> | 0.13 | 18.62 | 31.3%  ± 3/2)+29.5%  ± 5/2)+17.0%  ± 1/2) +16.3%  ± 7/2)...   |
| 416.981                    | 4.91×10 <sup>-2</sup> | 0.11 | 19.39 | 50.6%  ± 1/2)+28.4%  ± 3/2)+11.0%  ± 5/2)+4.8%  ± 7/2)...     |

**Table S17.** Electronic structure of **Dy3** in **Dy<sub>3</sub>ScI<sub>4</sub>** calculated with the crystal field parameters obtained from CASSCF-SO at the crystal structure. Each row corresponds to a Kramers doublet.

| Energy (cm <sup>-1</sup> ) | g1                    | g2   | g3    | Wavefunction                                                 |
|----------------------------|-----------------------|------|-------|--------------------------------------------------------------|
| 0.00                       | 5.23×10 <sup>-2</sup> | 0.12 | 19.56 | 94.7%  ± 15/2)+2.6%  ± 11/2)                                 |
| 85.745                     | 0.59                  | 0.70 | 18.02 | 20.6%  ± 9/2)+19.2%  ± 13/2)+14.6%  ± 7/2)+14.5%  ± 5/2)...  |
| 168.274                    | 9.63                  | 7.10 | 3.86  | 53.2%  ± 13/2)+12.6%  ± 3/2)+12.2%  ± 7/2) +8.3%  ± 1/2)...  |
| 219.525                    | 0.78                  | 3.41 | 8.58  | 35.2%  ± 11/2)+20.5%  ± 13/2)+14.8%  ± 5/2)+11.5%  ± 9/2)... |
| 276.030                    | 0.73                  | 1.78 | 12.27 | 34.8%  ± 11/2)+32.7%  ± 9/2)+13.7%  ± 7/2) +8.1%  ± 3/2)...  |
| 308.733                    | 0.57                  | 0.70 | 16.70 | 33.5%  ± 7/2)+26.8%  ± 5/2)+24.8%  ± 9/2)+7.7%  ± 3/2)...    |
| 383.596                    | 0.16                  | 0.22 | 16.92 | 33.8%  ± 3/2)+30.8%  ± 5/2)+15.7%  ± 1/2) +15.0%  ± 7/2)...  |
| 404.676                    | 9.66×10 <sup>-2</sup> | 0.36 | 17.93 | 54.1%  ± 1/2)+28.2%  ± 3/2)+8.1%  ± 5/2)+4.7%  ± 7/2)...     |

**Table S18.** Electronic structure of **Dy1** in **Dy<sub>3</sub>SeCl<sub>4</sub>** calculated with the crystal field parameters obtained from CASSCF-SO at the crystal structure. Each row corresponds to a Kramers doublet.

| Energy<br>(cm <sup>-1</sup> ) | g1                    | g2                    | g3    | Wavefunction                                                      |
|-------------------------------|-----------------------|-----------------------|-------|-------------------------------------------------------------------|
| 0.00                          | 3.12×10 <sup>-2</sup> | 6.46×10 <sup>-2</sup> | 19.68 | 97.4%   ± 15/2)                                                   |
| 101.261                       | 0.62                  | 0.91                  | 18.21 | 20.0%   ± 9/2)+16.3%   ± 13/2)+16.4%   ± 5/2)+16.2%   ± 7/2)...   |
| 173.140                       | 3.97                  | 6.60                  | 10.41 | 51.4%   ± 13/2)+12.7%   ± 7/2)+12.1%   ± 11/2) +10.1%   ± 3/2)... |
| 221.851                       | 0.15                  | 3.89                  | 8.85  | 30.0%   ± 11/2)+23.9%   ± 13/2)+14.2%   ± 9/2)+13.2%   ± 5/2)...  |
| 281.513                       | 0.98                  | 2.08                  | 12.11 | 33.6%   ± 11/2)+28.7%   ± 9/2)+13.3%   ± 7/2) +6.5%   ± 13/2)...  |
| 320.661                       | 0.43                  | 0.63                  | 17.07 | 31.8%   ± 7/2)+24.7%   ± 5/2)+24.4%   ± 9)+10.2%   ± 11/2)...     |
| 389.818                       | 0.10                  | 0.21                  | 18.20 | 32.5%   ± 13/2)+26.0%   ± 5/2)+24.5%   ± 1/2) +12.4%   ± 7/2)...  |
| 424.790                       | 9.18×10 <sup>-2</sup> | 0.29                  | 18.92 | 47.0%   ± 1/2)+28.0%   ± 3/2)+12.6%   ± 5/2)+6.5%   ± 7/2)...     |

**Table S19.** Electronic structure of **Dy2** in **Dy<sub>3</sub>SeCl<sub>4</sub>** calculated with the crystal field parameters obtained from CASSCF-SO at the crystal structure. Each row corresponds to a Kramers doublet.

| Energy<br>(cm <sup>-1</sup> ) | g1                    | g2   | g3    | Wavefunction                                                    |
|-------------------------------|-----------------------|------|-------|-----------------------------------------------------------------|
| 0.00                          | 5.91×10 <sup>-2</sup> | 0.14 | 19.63 | 97.0%   ± 15/2)                                                 |
| 85.920                        | 0.93                  | 1.31 | 18.13 | 20.3%   ± 5/2)+16.7%   ± 1/2)+16.6%   ± 3/2)+15.9%   ± 9/2)...  |
| 150.528                       | 4.21                  | 4.54 | 11.58 | 39.9%   ± 13/2)+17.8%   ± 7/2)+13.9%   ± 11/2)+8.9%   ± 3/2)... |
| 206.853                       | 8.44                  | 4.88 | 1.23  | 41.6%   ± 13/2)+24.1%   ± 11/2)+12.6%   ± 5/2)+9.3%   ± 1/2)... |
| 269.273                       | 1.55                  | 2.23 | 12.00 | 40.3%   ± 11/2)+30.9%   ± 9/2)+10.3%   ± 3/2)+8.4%   ± 13/2)... |
| 314.774                       | 0.35                  | 0.47 | 16.05 | 34.8%   ± 7/2)+26.5%   ± 9/2)+21.7%   ± 5/2)+12.0%   ± 11/2)... |
| 390.175                       | 3.42×10 <sup>-2</sup> | 0.10 | 18.11 | 32.1%   ± 5/2)+30.6%   ± 3/2)+17.6%   ± 7/2)+14.0%   ± 1/2)...  |
| 419.298                       | 3.28×10 <sup>-2</sup> | 0.12 | 19.09 | 53.1%   ± 1/2)+28.8%   ± 3/2)+9.2%   ± 5/2)+3.5%   ± 7/2)...    |

**Table S20.** Electronic structure of **Dy3** in **Dy<sub>3</sub>SeCl<sub>4</sub>** calculated with the crystal field parameters obtained from CASSCF-SO at the crystal structure. Each row corresponds to a Kramers doublet.

| Energy<br>(cm <sup>-1</sup> ) | g1                    | g2                    | g3    | Wavefunction                                                     |
|-------------------------------|-----------------------|-----------------------|-------|------------------------------------------------------------------|
| 0.00                          | 3.35×10 <sup>-2</sup> | 7.26×10 <sup>-2</sup> | 19.72 | 97.9%   ± 15/2)                                                  |
| 103.652                       | 0.92                  | 1.52                  | 18.10 | 19.8%   ± 5/2)+16.9%   ± 9/2)+15.3%   ± 3/2)+15.1%   ± 1/2)...   |
| 162.566                       | 4.27                  | 4.86                  | 11.11 | 45.1%   ± 13/2)+16.5%   ± 7/2)+13.9%   ± 11/2)+10.7%   ± 9/2)... |
| 214.768                       | 0.57                  | 4.51                  | 8.62  | 35.9%   ± 13/2)+25.7%   ± 11/2)+13.6%   ± 5/2)+8.7%   ± 1/2)...  |
| 273.421                       | 1.80                  | 2.32                  | 12.14 | 39.2%   ± 11/2)+30.6%   ± 9/2)+9.5%   ± 3/2)+8.0%   ± 7/2)...    |
| 317.398                       | 0.20                  | 0.34                  | 16.02 | 33.5%   ± 7/2)+25.8%   ± 9/2)+22.5%   ± 5/2)+11.6%   ± 11/2)...  |
| 385.394                       | 1.08×10 <sup>-2</sup> | 9.54×10 <sup>-2</sup> | 18.90 | 31.5%   ± 5/2)+28.2%   ± 3/2)+21.4%   ± 1/2)+14.3%   ± 7/2)...   |
| 430.855                       | 2.16×10 <sup>-2</sup> | 6.60×10 <sup>-2</sup> | 19.56 | 47.1%   ± 1/2)+28.6%   ± 3/2)+12.6%   ± 5/2)+5.9%   ± 7/2)...    |

**Table S21.** Electronic structure of **Dy1** in **Dy<sub>3</sub>TeCl<sub>4</sub>** calculated with the crystal field parameters obtained from CASSCF-SO at the crystal structure. Each row corresponds to a Kramers doublet.

| Energy (cm <sup>-1</sup> ) | g1                    | g2                    | g3                    | Wavefunction                                                       |
|----------------------------|-----------------------|-----------------------|-----------------------|--------------------------------------------------------------------|
| 0.00                       | 4.48×10 <sup>-3</sup> | 8.33×10 <sup>-3</sup> | 19.84                 | 99.5%   ± 15/2)                                                    |
| 168.402                    | 11.04                 | 8.81                  | 1.89                  | 52.2%   ± 13/2)+16.0%   ± 9/2)+13.2%   ± 5/2)+6.3%   ± 1/2)...     |
| 196.994                    | 5.50                  | 4.93                  | 1.49                  | 27.2%   ± 13/2)+24.0%   ± 11/2)+22.6%   ± 7/2) + 14.1%   ± 3/2)... |
| 245.736                    | 8.16                  | 6.33                  | 7.45×10 <sup>-2</sup> | 30.2%   ± 11/2)+26.2%   ± 9/2)+18.0%   ± 13/2)+12.7%   ± 5/2)...   |
| 299.713                    | 2.31                  | 3.97                  | 11.78                 | 37.6%   ± 11/2)+28.5%   ± 9/2)+17.7%   ± 7/2)+11.2%   ± 3/2)...    |
| 332.135                    | 0.80                  | 1.04                  | 16.22                 | 33.1%   ± 7/2)+31.6%   ± 5/2)+21.8%   ± 9/2)+9.2%   ± 3/2)...      |
| 413.894                    | 0.23                  | 0.30                  | 16.60                 | 34.8%   ± 3/2)+30.7%   ± 5/2)+17.2%   ± 1/2)+13.2%   ± 7/2)...     |
| 440.325                    | 0.12                  | 0.51                  | 17.95                 | 55.5%   ± 1/2)+27.5%   ± 3/2)+8.1%   ± 5/2)+4.7%   ± 7/2)...       |

**Table S22.** Electronic structure of **Dy2** in **Dy<sub>3</sub>TeCl<sub>4</sub>** calculated with the crystal field parameters obtained from CASSCF-SO at the crystal structure. Each row corresponds to a Kramers doublet.

| Energy (cm <sup>-1</sup> ) | g1                    | g2                    | g3    | Wavefunction                                                       |
|----------------------------|-----------------------|-----------------------|-------|--------------------------------------------------------------------|
| 0.00                       | 7.98×10 <sup>-3</sup> | 1.48×10 <sup>-2</sup> | 19.83 | 98.4%   ± 15/2)                                                    |
| 152.061                    | 1.51                  | 4.27                  | 15.88 | 25.1%   ± 13/2)+18.3%   ± 5/2)+17.8%   ± 9/2)+11.5%   ± 1/2)...    |
| 186.563                    | 2.59                  | 4.84                  | 8.16  | 47.4%   ± 13/2)+18.8%   ± 7/2)+17.2%   ± 11/2) + 10.2%   ± 3/2)... |
| 232.725                    | 8.27                  | 5.80                  | 0.63  | 27.5%   ± 11/2)+24.3%   ± 13/2)+20.9%   ± 9/2)+13.6%   ± 5/2)...   |
| 284.017                    | 2.64                  | 3.84                  | 11.77 | 41.2%   ± 11/2)+28.3%   ± 9/2)+13.5%   ± 7/2)+8.5%   ± 3/2)...     |
| 318.948                    | 0.51                  | 0.66                  | 15.92 | 33.0%   ± 7/2)+31.6%   ± 5/2)+24.0%   ± 9/2)+7.7%   ± 3/2)...      |
| 388.706                    | 2.42×10 <sup>-2</sup> | 0.13                  | 18.74 | 33.2%   ± 3/2)+27.4%   ± 5/2)+22.5%   ± 1/2)+12.8%   ± 7/2)...     |
| 434.592                    | 2.69×10 <sup>-2</sup> | 8.43×10 <sup>-2</sup> | 19.46 | 48.4%   ± 1/2)+28.3%   ± 3/2)+12.0%   ± 5/2)+5.8%   ± 7/2)...      |

**Table S23.** Electronic structure of **Dy3** in **Dy<sub>3</sub>TeCl<sub>4</sub>** calculated with the crystal field parameters obtained from CASSCF-SO at the crystal structure. Each row corresponds to a Kramers doublet.

| Energy (cm <sup>-1</sup> ) | g1                    | g2                    | g3    | Wavefunction                                                       |
|----------------------------|-----------------------|-----------------------|-------|--------------------------------------------------------------------|
| 0.00                       | 1.11×10 <sup>-2</sup> | 2.13×10 <sup>-2</sup> | 19.81 | 99.1%   ± 15/2)                                                    |
| 134.983                    | 1.54                  | 4.03                  | 16.21 | 19.1%   ± 13/2)+18.7%   ± 5/2)+17.4%   ± 9/2)+13.0%   ± 3/2)...    |
| 171.416                    | 2.41                  | 4.87                  | 8.54  | 42.8%   ± 13/2)+18.9%   ± 7/2)+16.1%   ± 11/2) + 10.5%   ± 3/2)... |
| 222.549                    | 8.04                  | 5.86                  | 0.16  | 33.8%   ± 13/2)+24.5%   ± 11/2)+14.7%   ± 9/2)+13.6%   ± 5/2)...   |
| 280.918                    | 2.92                  | 3.49                  | 11.60 | 43.0%   ± 11/2)+28.7%   ± 9/2)+9.9%   ± 7/2)+9.4%   ± 3/2)...      |
| 323.738                    | 0.33                  | 0.47                  | 15.85 | 34.2%   ± 7/2)+26.4%   ± 9/2)+24.7%   ± 5/2)+7.9%   ± 11/2)...     |
| 405.698                    | 5.87×10 <sup>-2</sup> | 0.11                  | 16.80 | 35.2%   ± 5/2)+33.0%   ± 3/2)+18.3%   ± 7/2)+8.7%   ± 1/2)...      |
| 432.372                    | 2.80×10 <sup>-2</sup> | 0.16                  | 18.32 | 60.7%   ± 1/2)+28.4%   ± 3/2)+5.5%   ± 5/2)...                     |
